# Supplementary material for: The chemical forces underlying octahedral tilting in halide perovskites
Source: Royal Society of Chemistry journal article supplement (doi:10.1039/c8tc02976h), 2018-01-01
Supplement: c8tc02976h1.pdf [file c8tc02976h1.pdf]

## Supporting information for “The chemical forces underlying octahedral tilting in halide perovskites”

Keith T. Butler

### Spacegroup *P4/mbm* compared to *Pm3m*

In the main paper I state that the comparison of *P4/mbm* compared to *Pm3m* is so similar to the comparison of *I4/mcm* to *Pm3m* that it did not warrant inclusion in the main article. Nonetheless it is important that this claim be substantiated, therefore I present here the plot of energy differences of *P4/mbm* and *Pm3m*. The reader can compare them to Figure 3 of the main text, to test the veracity of my statement.

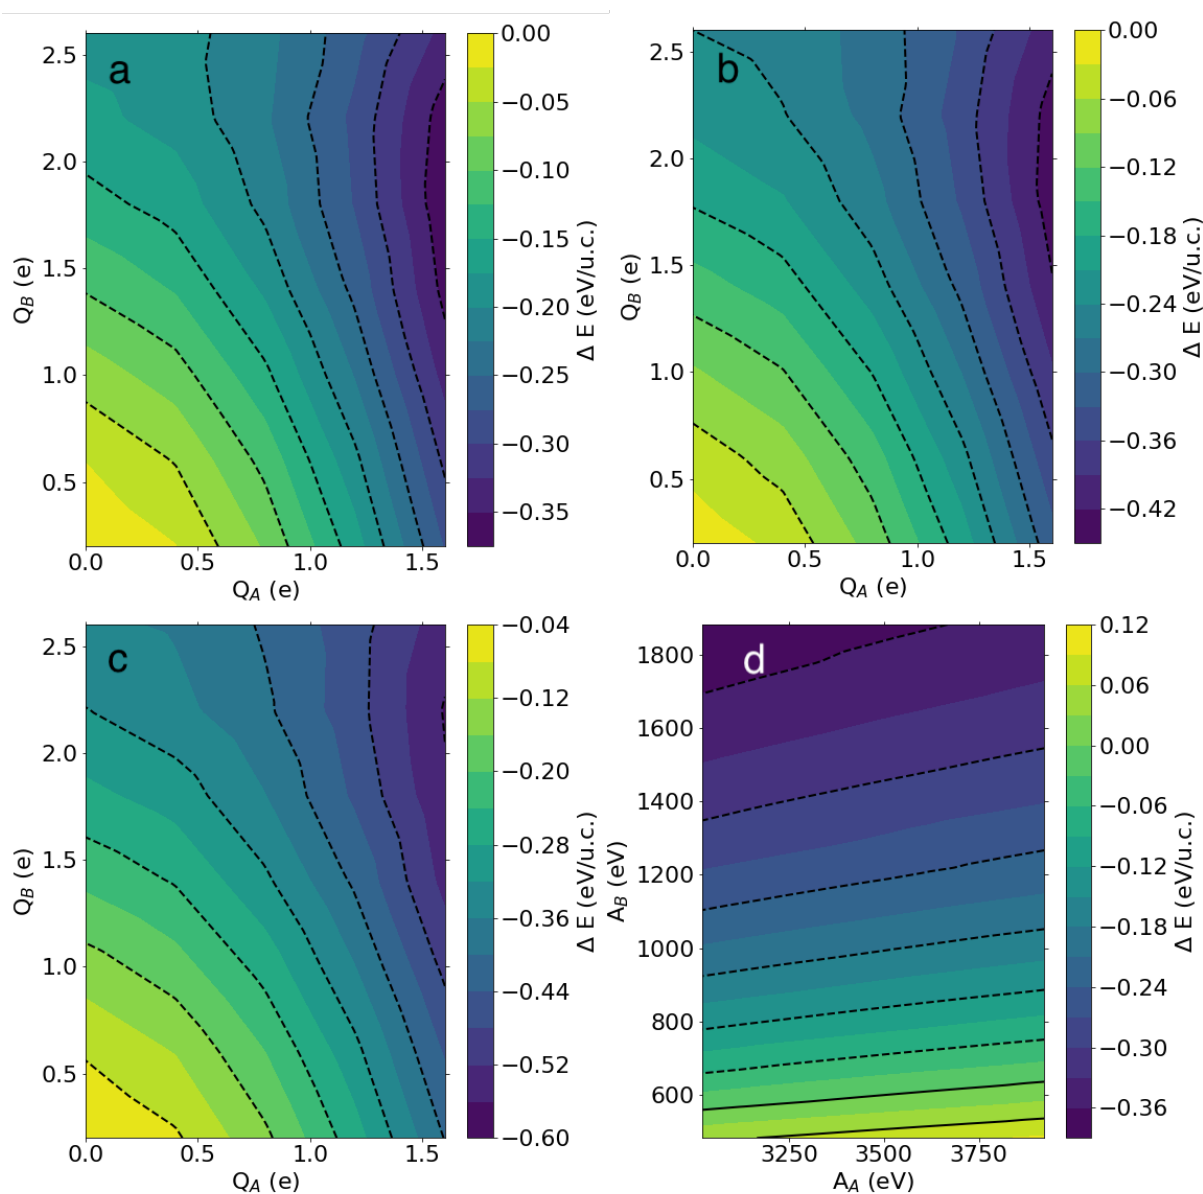

Figure S1 Energy of *Pm3m* minus energy of *P4/mbm*, varying A and B site ionicity (a-c), with dispersion interaction C of 0.0 (a), 40.0 (b) and 100.0 (c); varying A and B site repulsion (d).
